# Supplementary material
Source: MDPI journal article supplement (https://www.mdpi.com/search?q=healthcare-07-00113)
Supplement: s001 [file healthcare-07-00113-s001.pdf]

## Supplementary: Questionnaire

# Mentorship and Clinical Governance Awareness Questionnaire

There are four parts to this questionnaire, please complete all sections:

Parts A and B is concerned with collecting information on those physical and personality characteristics of mentorship and the factors that may influence the mentoring relationship: Part C is about your awareness of clinical governance and part D associated with demographic information.

**PART A** \*Adapted from the works of Darling (1984) with kind permission for reproduction by Journal of Administration in Nursing

**(Use of Rating Scale 1-5) and opportunity to comment**

The following section of the questionnaire presents a number of characteristics, identified by health care practitioners as significant in their guidance and growth. Using the scale of 1 – 5 (where 5 is very relevant/important and 1 is of lower relevance/importance) use this questionnaire to assess the relevance and importance your perceptions of the mentor's, an explanation is given for each characteristic where appropriate. Please ✓ and rate your response as 1 if not very relevant/important and 5 if very relevant/important.

|                                                                                                                                                              | 1                        | 2                        | 3                        | 4                        | 5                        |
|--------------------------------------------------------------------------------------------------------------------------------------------------------------|--------------------------|--------------------------|--------------------------|--------------------------|--------------------------|
| <b>Standard-prodder</b><br>Some one who was very clear about what was required, helped drive towards high aspirations and standards and would keep prodding. | <input type="checkbox"/> | <input type="checkbox"/> | <input type="checkbox"/> | <input type="checkbox"/> | <input type="checkbox"/> |
| <b>Teacher-Coach</b><br>Someone who provided guidance on clinical problems, taught and explained how to prioritize and develop interpersonal skills.         | <input type="checkbox"/> | <input type="checkbox"/> | <input type="checkbox"/> | <input type="checkbox"/> | <input type="checkbox"/> |
| <b>Feedback-Giver</b><br>Some one who provided a lot of positive, constructive feedback, identified when practice                                            | <input type="checkbox"/> | <input type="checkbox"/> | <input type="checkbox"/> | <input type="checkbox"/> | <input type="checkbox"/> |

|                                                                                                                                                                                      |                          |                          |                          |                          |                          |
|--------------------------------------------------------------------------------------------------------------------------------------------------------------------------------------|--------------------------|--------------------------|--------------------------|--------------------------|--------------------------|
| wasn't right and how to improve practice by examining it.                                                                                                                            |                          |                          |                          |                          |                          |
| <b>Eye Opener</b><br>Someone who "opened eyes" encouraged interest in research and helped me to understand the nature and "politics" of the professional and health care environment | <input type="checkbox"/> | <input type="checkbox"/> | <input type="checkbox"/> | <input type="checkbox"/> | <input type="checkbox"/> |
| <b>Door-Opener</b><br>Someone who made services and opportunities available and adopted an inclusive approach.                                                                       | <input type="checkbox"/> | <input type="checkbox"/> | <input type="checkbox"/> | <input type="checkbox"/> | <input type="checkbox"/> |
| <b>Idea-Bouncer</b><br>Encourages the mentee to explore ideas, discuss issues, problems, and goals and bring things into focus                                                       | <input type="checkbox"/> | <input type="checkbox"/> | <input type="checkbox"/> | <input type="checkbox"/> | <input type="checkbox"/> |
| <b>Problem-Solver</b><br>Someone who adopted solution focus and problem solving approaches                                                                                           | <input type="checkbox"/> | <input type="checkbox"/> | <input type="checkbox"/> | <input type="checkbox"/> | <input type="checkbox"/> |
| <b>Career Counsellor</b><br>Someone who encourages personal development and career planning. Looking to the future                                                                   | <input type="checkbox"/> | <input type="checkbox"/> | <input type="checkbox"/> | <input type="checkbox"/> | <input type="checkbox"/> |
| <b>Challenger</b><br>Someone who encouraged self reflection, looking at decisions and encouraging justification for the point made                                                   | <input type="checkbox"/> | <input type="checkbox"/> | <input type="checkbox"/> | <input type="checkbox"/> | <input type="checkbox"/> |

**PART B (use of Rating Scale 1-5)**

The following section asks you to consider a number of personality characteristics, identified by health care practitioners as significant to the mentor personality. Using the scale of 1 – 5 (where 5 is very relevant/important and 1 is of lower relevance/importance). Please √ the appropriate box.

|                | 1                        | 2                        | 3                        | 4                        | 5                        |
|----------------|--------------------------|--------------------------|--------------------------|--------------------------|--------------------------|
| • Approachable | <input type="checkbox"/> | <input type="checkbox"/> | <input type="checkbox"/> | <input type="checkbox"/> | <input type="checkbox"/> |

|                               |                          |                          |                          |                          |                          |
|-------------------------------|--------------------------|--------------------------|--------------------------|--------------------------|--------------------------|
|                               |                          |                          |                          |                          |                          |
| • Friendly                    | <input type="checkbox"/> | <input type="checkbox"/> | <input type="checkbox"/> | <input type="checkbox"/> | <input type="checkbox"/> |
| • Nice                        | <input type="checkbox"/> | <input type="checkbox"/> | <input type="checkbox"/> | <input type="checkbox"/> | <input type="checkbox"/> |
| • Non bias and non-judgmental | <input type="checkbox"/> | <input type="checkbox"/> | <input type="checkbox"/> | <input type="checkbox"/> | <input type="checkbox"/> |
| • Patient                     | <input type="checkbox"/> | <input type="checkbox"/> | <input type="checkbox"/> | <input type="checkbox"/> | <input type="checkbox"/> |
| • Enthusiastic                | <input type="checkbox"/> | <input type="checkbox"/> | <input type="checkbox"/> | <input type="checkbox"/> | <input type="checkbox"/> |
| • Negotiation Skills          | <input type="checkbox"/> | <input type="checkbox"/> | <input type="checkbox"/> | <input type="checkbox"/> | <input type="checkbox"/> |
| • Trust                       | <input type="checkbox"/> | <input type="checkbox"/> | <input type="checkbox"/> | <input type="checkbox"/> | <input type="checkbox"/> |
| • Communication               | <input type="checkbox"/> | <input type="checkbox"/> | <input type="checkbox"/> | <input type="checkbox"/> | <input type="checkbox"/> |
| • Empathy                     | <input type="checkbox"/> | <input type="checkbox"/> | <input type="checkbox"/> | <input type="checkbox"/> | <input type="checkbox"/> |
| • Empowering                  | <input type="checkbox"/> | <input type="checkbox"/> | <input type="checkbox"/> | <input type="checkbox"/> | <input type="checkbox"/> |
| • Confident                   | <input type="checkbox"/> | <input type="checkbox"/> | <input type="checkbox"/> | <input type="checkbox"/> | <input type="checkbox"/> |
| • Motivation                  | <input type="checkbox"/> | <input type="checkbox"/> | <input type="checkbox"/> | <input type="checkbox"/> | <input type="checkbox"/> |
| • Reflective                  | <input type="checkbox"/> | <input type="checkbox"/> | <input type="checkbox"/> | <input type="checkbox"/> | <input type="checkbox"/> |
| • Leadership                  | <input type="checkbox"/> | <input type="checkbox"/> | <input type="checkbox"/> | <input type="checkbox"/> | <input type="checkbox"/> |
| • Willingness                 | <input type="checkbox"/> | <input type="checkbox"/> | <input type="checkbox"/> | <input type="checkbox"/> | <input type="checkbox"/> |

**PART C: CLINICAL GOVERNANCE AWARENESS QUESTIONNAIRE (McSherry and Pearce 2010) - Reproduced with kind permission from Wiley, Blackwell Publishers.**

In relation to the following questions, on a scale of one to five, one being strongly agree, and five strongly disagree, please ☐ tick the box that matches your view most closely.

|                                                                                                                                             | 1                        | 2                        | 3                        | 4                        | 5                        |
|---------------------------------------------------------------------------------------------------------------------------------------------|--------------------------|--------------------------|--------------------------|--------------------------|--------------------------|
| Clinical governance has a large part to play in improving patient care.                                                                     | <input type="checkbox"/> | <input type="checkbox"/> | <input type="checkbox"/> | <input type="checkbox"/> | <input type="checkbox"/> |
| Clinical governance is part of my role and responsibility.                                                                                  | <input type="checkbox"/> | <input type="checkbox"/> | <input type="checkbox"/> | <input type="checkbox"/> | <input type="checkbox"/> |
| In using the clinical governance framework to support my practice I see benefit for myself.                                                 | <input type="checkbox"/> | <input type="checkbox"/> | <input type="checkbox"/> | <input type="checkbox"/> | <input type="checkbox"/> |
| Engaging with the clinical governance framework can influence patient care.                                                                 | <input type="checkbox"/> | <input type="checkbox"/> | <input type="checkbox"/> | <input type="checkbox"/> | <input type="checkbox"/> |
| Clinical governance is a useful framework to change clinical practice at an individual, team and organisational level.                      | <input type="checkbox"/> | <input type="checkbox"/> | <input type="checkbox"/> | <input type="checkbox"/> | <input type="checkbox"/> |
| Engaging with the clinical governance framework can have a benefit in changing culture in the working environment.                          | <input type="checkbox"/> | <input type="checkbox"/> | <input type="checkbox"/> | <input type="checkbox"/> | <input type="checkbox"/> |
| I have sufficient support and encouragement from peers and professionals to engage with the clinical governance framework.                  | <input type="checkbox"/> | <input type="checkbox"/> | <input type="checkbox"/> | <input type="checkbox"/> | <input type="checkbox"/> |
| I have sufficient support from the management within my Directorate / clinical area to engage with clinical governance framework.           | <input type="checkbox"/> | <input type="checkbox"/> | <input type="checkbox"/> | <input type="checkbox"/> | <input type="checkbox"/> |
| In my training I received adequate information about what the clinical governance framework is and how it may aid improve quality services. | <input type="checkbox"/> | <input type="checkbox"/> | <input type="checkbox"/> | <input type="checkbox"/> | <input type="checkbox"/> |
| I have a basic knowledge and understanding of clinical governance and associated systems and processes.                                     | <input type="checkbox"/> | <input type="checkbox"/> | <input type="checkbox"/> | <input type="checkbox"/> | <input type="checkbox"/> |
| I am confident to engage with the clinical governance framework.                                                                            | <input type="checkbox"/> | <input type="checkbox"/> | <input type="checkbox"/> | <input type="checkbox"/> | <input type="checkbox"/> |
| Is clinical governance enhanced by mentorship                                                                                               | <input type="checkbox"/> | <input type="checkbox"/> | <input type="checkbox"/> | <input type="checkbox"/> | <input type="checkbox"/> |

|                                                                                                                                                   |                                 |                                |  |                                                              |
|---------------------------------------------------------------------------------------------------------------------------------------------------|---------------------------------|--------------------------------|--|--------------------------------------------------------------|
| Have you witnessed any change in practice that was related from individuals, teams or organisation engaging in the clinical governance framework? | Yes<br><input type="checkbox"/> | No<br><input type="checkbox"/> |  | If you answered yes to the Questions please explain opposite |
| Have you read any professional journal articles or books on clinical governance or mentorship?                                                    | Yes<br><input type="checkbox"/> | No<br><input type="checkbox"/> |  | If you answered yes to the Questions please explain opposite |
| Have you had any clinical governance education and training?                                                                                      | Yes<br><input type="checkbox"/> | No<br><input type="checkbox"/> |  | If you answered yes to the Questions please explain opposite |

| Please write your response in the box provided opposite.                                               |  |
|--------------------------------------------------------------------------------------------------------|--|
| What do you feel are the main drivers for introducing clinical governance into the healthcare service? |  |
| What do you understand by the term clinical governance?                                                |  |
| What would you describe as the key components of clinical governance?                                  |  |
| What do you feel are the main drivers for introducing mentorship into the healthcare service?          |  |

|                                                                                                              |                                                                              |
|--------------------------------------------------------------------------------------------------------------|------------------------------------------------------------------------------|
|                                                                                                              |                                                                              |
| Can you list the three greatest barriers affecting your engagement with the clinical governance frameworks ? | <ol style="list-style-type: none"> <li>1.</li> <li>2.</li> <li>3.</li> </ol> |
| Can you list the three greatest barriers affecting your engagement with the Mentorship in practice ?         | <ol style="list-style-type: none"> <li>1.</li> <li>2.</li> <li>3.</li> </ol> |

Which of the following statements best describes clinical governance to you  
(✓ the appropriate box)

|                                                                                                                              |                          |
|------------------------------------------------------------------------------------------------------------------------------|--------------------------|
| Clinical governance is the role and responsibility of chief executives and managers in maintaining quality care and services | <input type="checkbox"/> |
| Clinical governance is a quality framework and should be part of everyone's role and responsibility                          | <input type="checkbox"/> |
| Don't know                                                                                                                   | <input type="checkbox"/> |
| None of the above                                                                                                            | <input type="checkbox"/> |

|                                                                              |                          |
|------------------------------------------------------------------------------|--------------------------|
| Clinical governance is only about dealing with risks and managing complaints | <input type="checkbox"/> |
|------------------------------------------------------------------------------|--------------------------|

|                                                                                                                                                                                                                                                                                                                     |                          |
|---------------------------------------------------------------------------------------------------------------------------------------------------------------------------------------------------------------------------------------------------------------------------------------------------------------------|--------------------------|
| <p>For clinical governance to occur in an organisation the following systems and processes need to be in place:</p> <ul style="list-style-type: none"> <li>• Risk management</li> <li>• Performance management</li> <li>• Quality improvement programme</li> <li>• Information</li> <li>• Accountability</li> </ul> | <input type="checkbox"/> |
| <p>Don't know</p>                                                                                                                                                                                                                                                                                                   | <input type="checkbox"/> |
| <p>None of the above</p>                                                                                                                                                                                                                                                                                            |                          |

Please provide any necessary information relating to your answers or regarding to the questions contained in the questionnaire in the box provided.

**Please identify the question/s your comments relate to**



**Part D: Demographic Information**

What is your position.

|                                                                             |                          |
|-----------------------------------------------------------------------------|--------------------------|
| Doctor                                                                      | <input type="checkbox"/> |
| Hospital Midwife                                                            | <input type="checkbox"/> |
| Community Midwife                                                           | <input type="checkbox"/> |
| Registered Nurse                                                            | <input type="checkbox"/> |
| <b>Allied Health Professional:</b><br>Please state your profession opposite |                          |
| Health Care Assistant                                                       | <input type="checkbox"/> |

When did you qualify as a Healthcare Professional

Please state your grade:

Please state which clinical specialty you currently work in:

|  |
|--|
|  |
|--|

| Which of the following hours do you work? |                          |
|-------------------------------------------|--------------------------|
| 10-14                                     | <input type="checkbox"/> |
| 15-20                                     | <input type="checkbox"/> |
| 21-24                                     | <input type="checkbox"/> |
| 25-30                                     | <input type="checkbox"/> |
| 31-37.5                                   | <input type="checkbox"/> |

| Please state your professional qualifications and additional qualifications. |
|------------------------------------------------------------------------------|
| <p><b>Professional:</b></p><br><br><p><b>Additional:</b></p>                 |

**Thank you very much  
for taking the time to complete and  
return this questionnaire.  
All your responses will be confidential  
and no comment will attributable to  
you**
